# Supplementary material for: Exploitation of the chick embryo chorioallantoic membrane (CAM) as a platform for anti-metastatic drug testing
Source: PubMed Central journal article supplement (PMC7547099; doi:10.1038/s41598-020-73632-w), 2020-10-09
Supplement: 41598_2020_73632_MOESM1_ESM.pdf [file 41598_2020_73632_MOESM1_ESM.pdf]

**Exploitation of the chick embryo chorioallantoic membrane (CAM) as a platform for anti-  
metastatic drug testing**

Pawlikowska P, Tayoun T, Oulhen M, Faugeroux V, Rouffiac V, Aberlenc A,  
Pommier AL, Honore A, Marty V, Bawa O, Lacroix L, Scoazec JY, Chauchereau A,  
Laplace-Builhe C, Farace F

Supplementary Material

**a**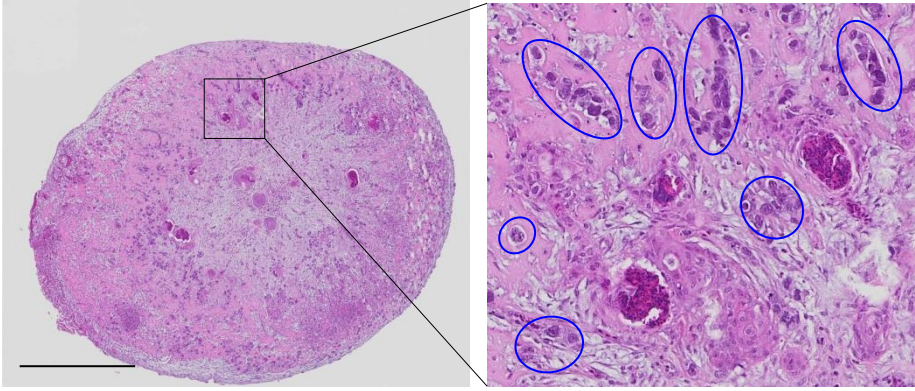**b**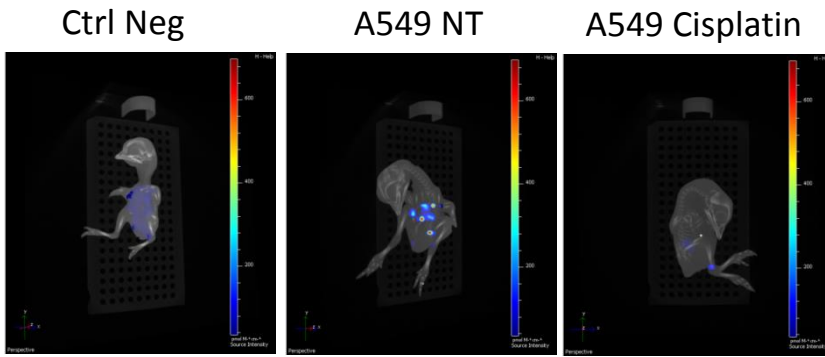**c**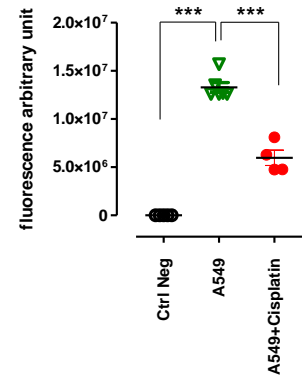

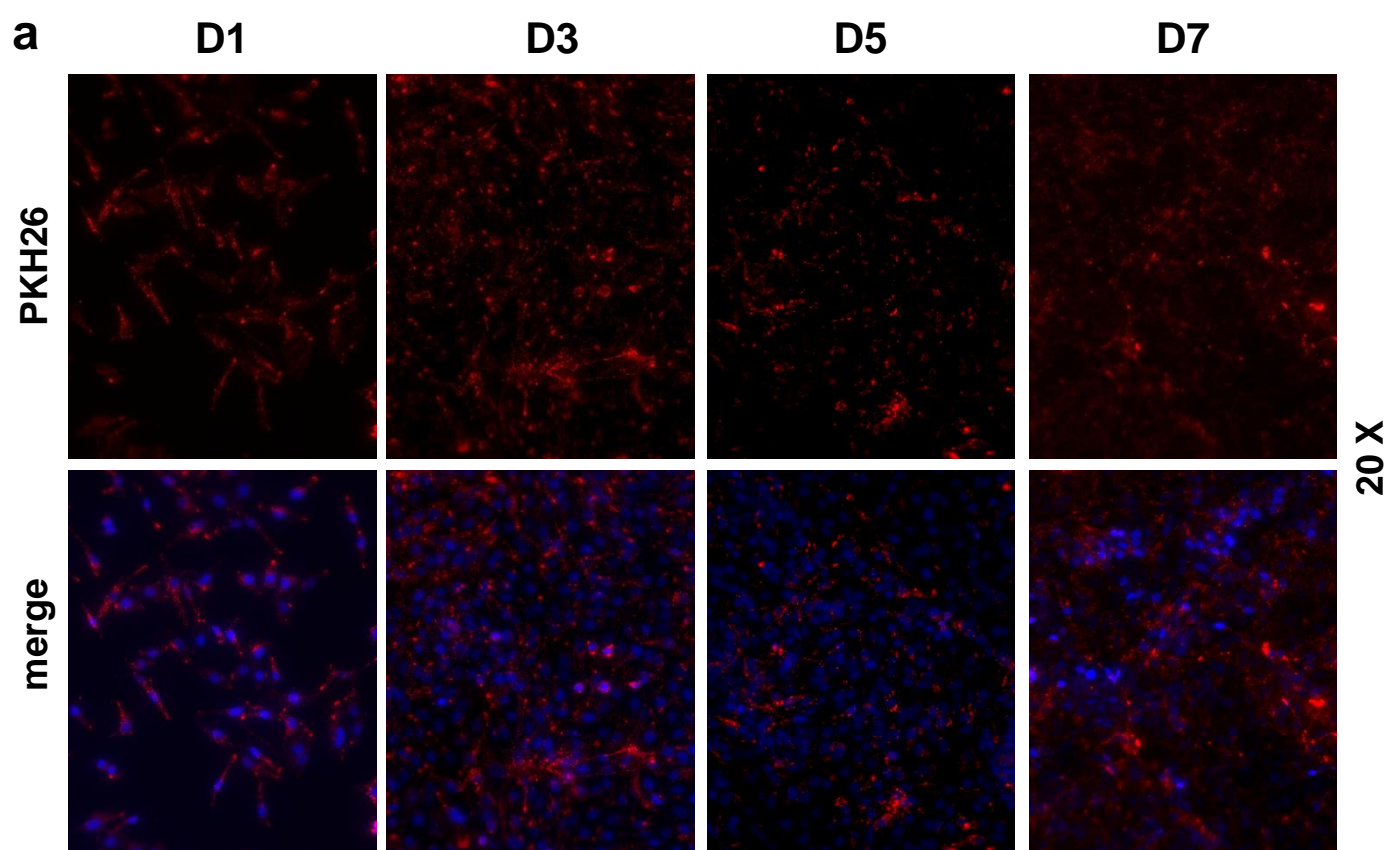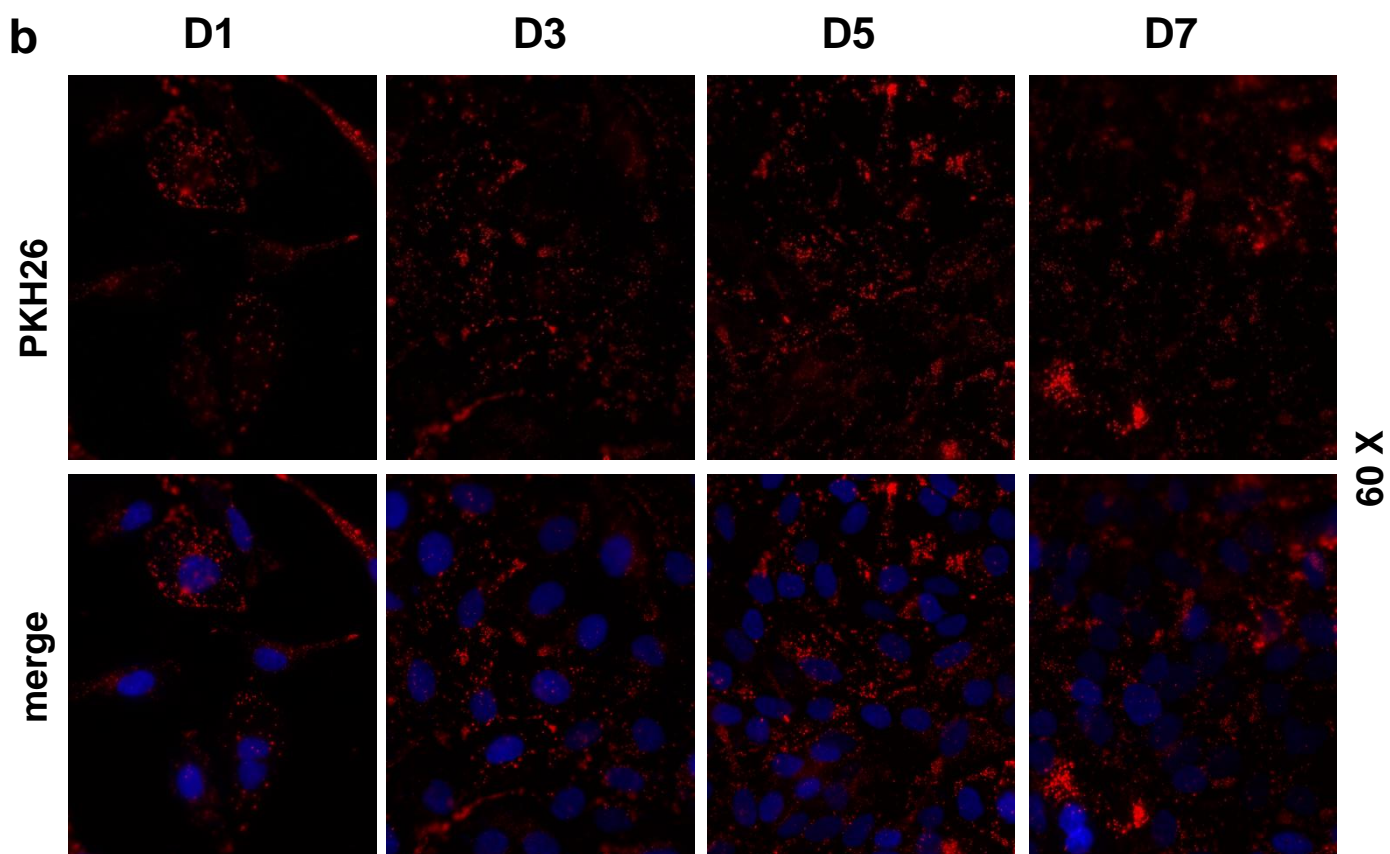

Supplementary Figure 2.

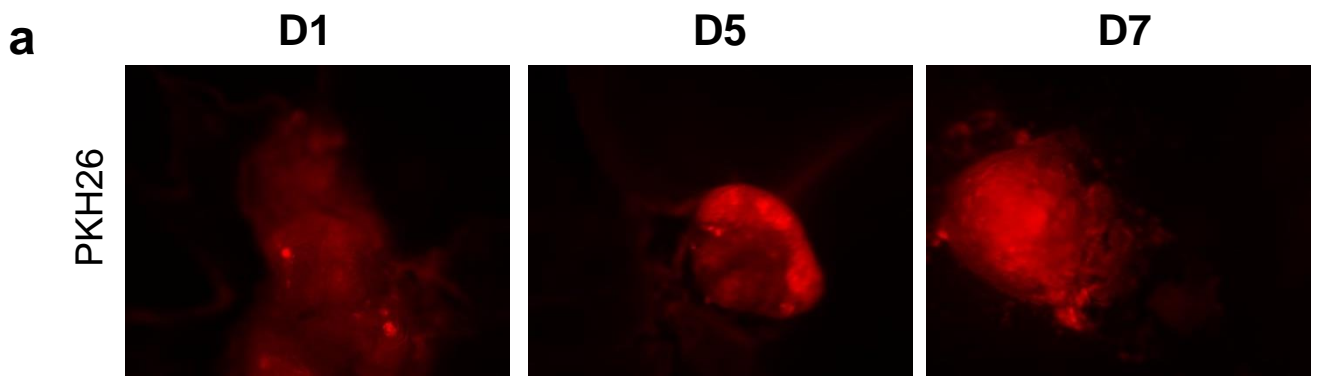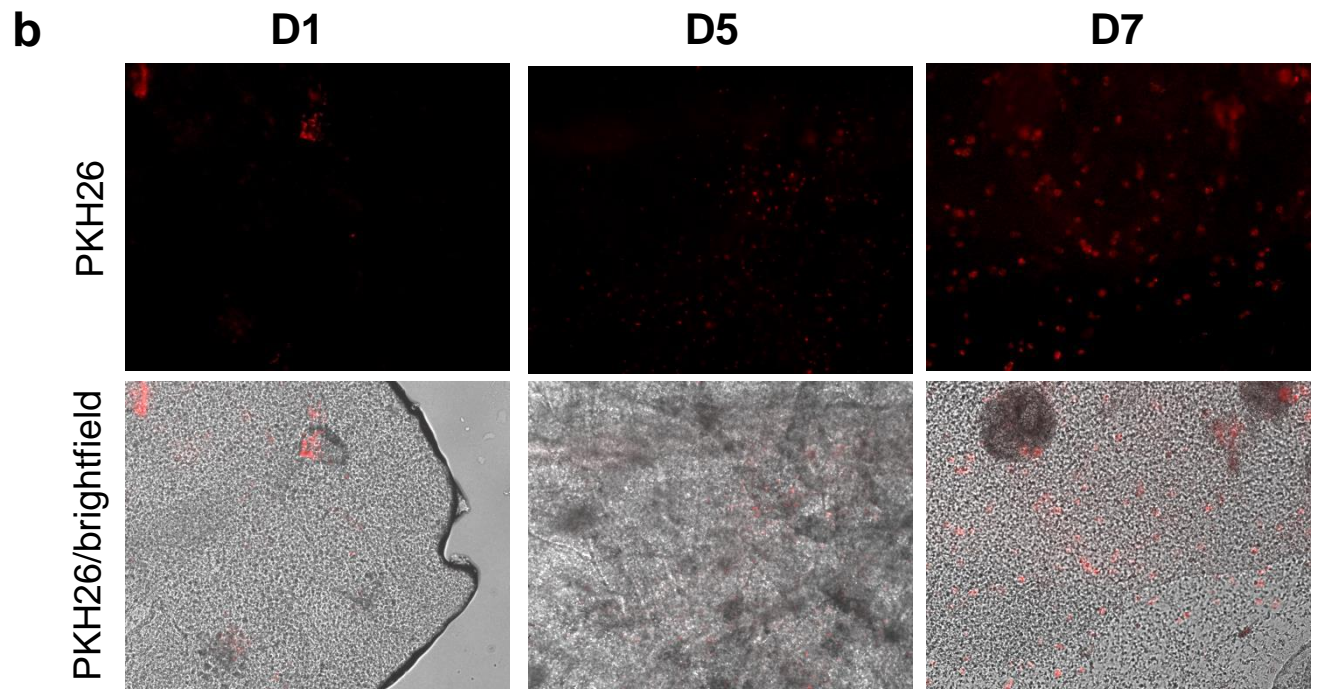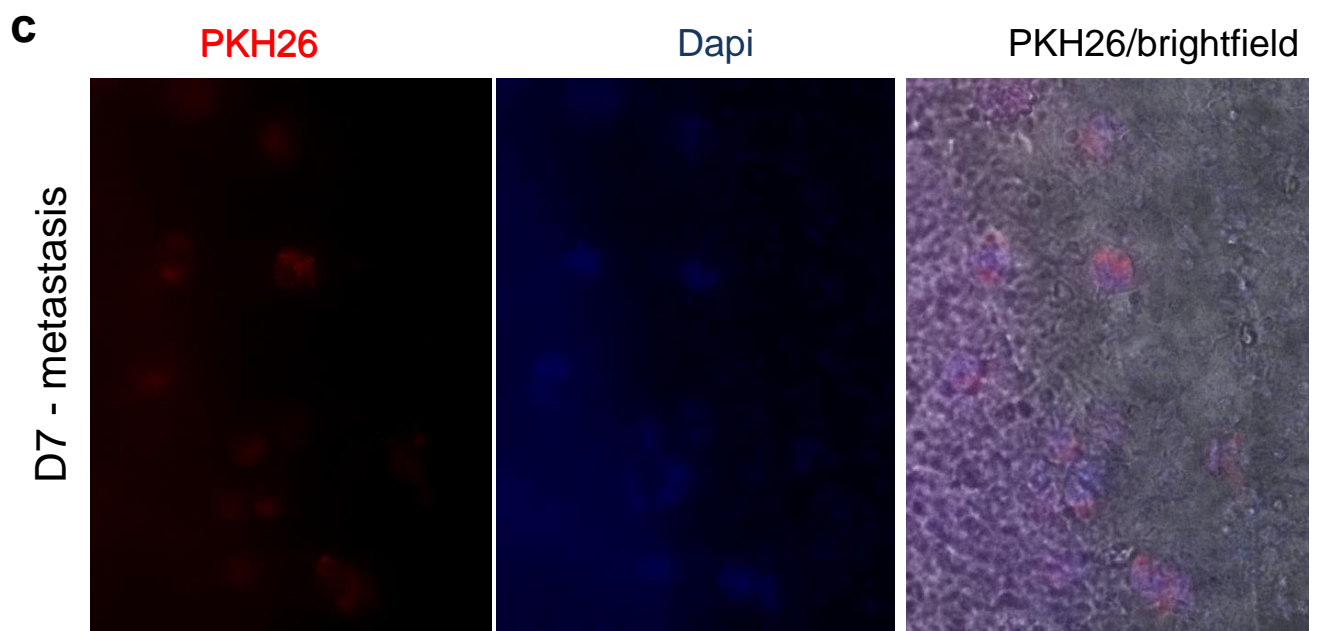

Supplementary Figure 3.

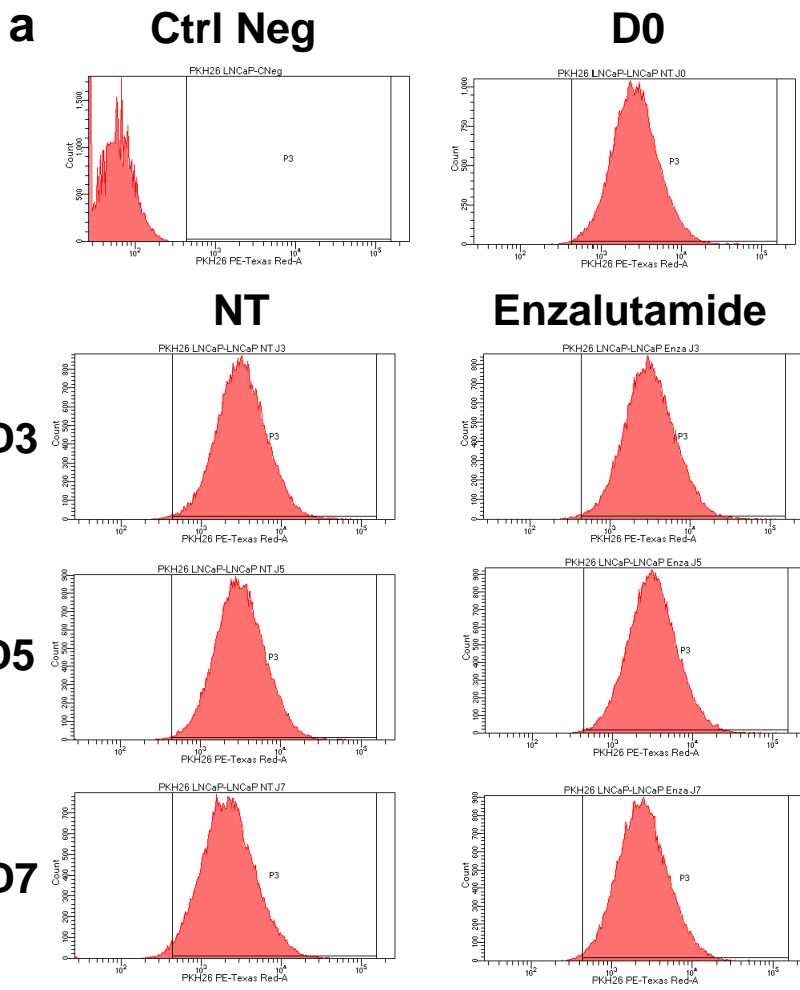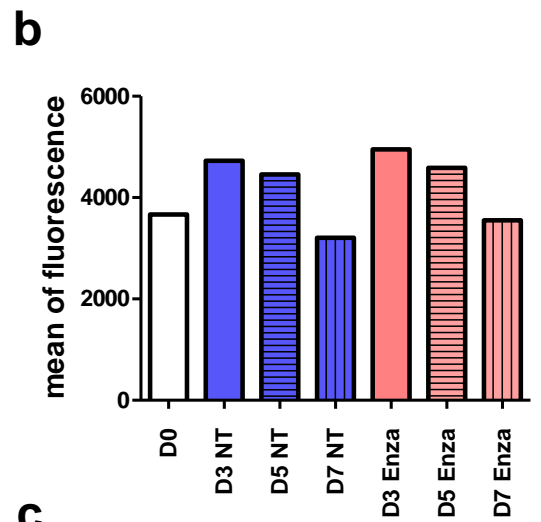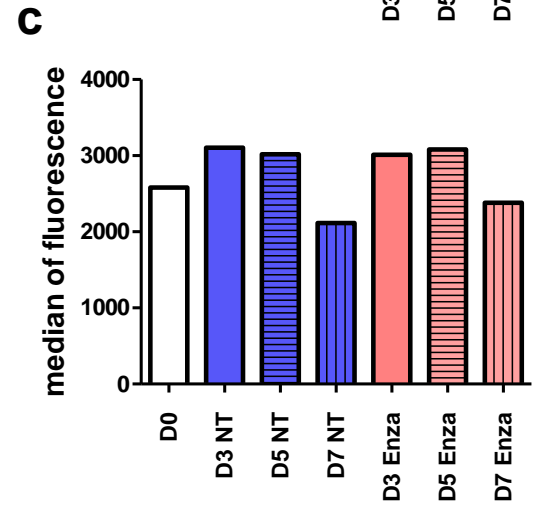

Supplementary Figure 4.

## Supplementary Figures

Fig. 1. a. Tumor nodules of H1299-GFP, FFPE sections stained with HES. Areas with tumor cells were framed. b. Representative images of fluorescent metastatic foci formed by A549 mCherry cells with or without cisplatin treatment. c. Quantitative analysis of mean fluorescence from 3D analysis of chick embryos after implantation of A549 mCherry cells. Experiment was performed twice and the representative one is shown. Each point represents a single embryo.

Fig. 2. Representative images showing the pattern and intensity of PKH26 staining during 7 days of *in vitro* culture of LNCaP cell line. Magnification 20x a, and 60x b. Images were captured using NIS Elements software Version 4.0; AR Ver4.00.05 for 64bit edition (Nikon Instruments Inc., <https://www.microscope.healthcare.nikon.com/products/software/nis-elements>).

Fig. 3. Representative images showing a. tumor nodules obtained from LNCaP stained with PKH26 and collected at different time-points; examined *in vivo* by a fluorescence microscope. Images were captured using NIS Elements software Version 3.2; BR Ver for 64bit edition (Nikon Instruments Inc., <https://www.microscope.healthcare.nikon.com/products/software/nis-elements>). b. PKH26 fluorescent cells presented in tumor nodules using fluorescent microscope (20x) with the corresponding bright field images. c. Example of metastatic foci in esophagus inner membrane of chick embryo 7 days after implantation of LNCaP cells stained with PKH26. Images obtained using fluorescent microscope (20x) with the corresponding bright field images. Images were captured using NIS Elements software Version 4.0; AR Ver4.00.05 for 64bit edition (Nikon Instruments Inc., <https://www.microscope.healthcare.nikon.com/products/software/nis-elements>).

Fig. 4. *In vitro* analysis of LNCaP cells stained at D0 with PKH26 and treated or not with enzalutamide (500 nM) during 7 days. PKH26 fluorescence intensity was measured by FACS. a. FACS histograms showing PKH26 fluorescence at different days of the experiment and negative control presenting non-stained cells. b. Graph representing mean of PKH26 fluorescence at each day of experiment. c. Graph representing median of PKH26 fluorescence at each day of experiment.

| Cell line | Tumor type                                    | alteration                                            | origin                                      |
|-----------|-----------------------------------------------|-------------------------------------------------------|---------------------------------------------|
| NCI-H1299 | Large cell carcinoma                          | NRAS Q61K                                             | ATCC                                        |
| NCI-H1975 | Non-small cell lung carcinoma                 | EGFR T790M<br>EGFR L858R<br>TP53 R273H<br>CDKN2A E69* | ATCC                                        |
| A549      | Non-small cell lung carcinoma                 | KRAS G12S                                             | ATCC                                        |
| NCI-H2228 | Non-small cell lung carcinoma                 | EML4-ALK fusion                                       | ATCC                                        |
| NCI-H1650 | Non-small cell lung carcinoma                 | EGFR delE746-A750                                     | ATCC                                        |
| LNCaP     | Prostate carcinoma Androgen receptor positive | PTEN loss                                             | ATCC                                        |
| DU145     | Prostate carcinoma Androgen-independent       | 8q gain                                               | ATCC                                        |
| IGR-CaP1  | Prostate carcinoma                            | TP53 Y126C                                            | <sup>19</sup> Al Nakouzi <i>et al.</i> 2012 |
| GR-CDX P1 | Prostate carcinoma                            | TP53, RB1, PTEN loss                                  | <sup>23</sup> Faugeroux <i>et al.</i> 2020  |

Supplementary Table 1. List of used cell lines with their short characteristics.

| Fluorescent protein/dye | Excitation (nm) | Emission (nm) | Advantages in context of CAM model                                                                                                                                     | Disadvantages in context of CAM model                                                                                  |
|-------------------------|-----------------|---------------|------------------------------------------------------------------------------------------------------------------------------------------------------------------------|------------------------------------------------------------------------------------------------------------------------|
| GFP                     | 465             | 520           | Very stable and non-toxic                                                                                                                                              | Sensitivity of fluorescent imaging is limited by strong and heterogeneous auto-fluorescence signal of the chick embryo |
| mCherry                 | 570             | 620           | Compatible with deep imaging, low auto-fluorescent background, resistant to photo-bleaching                                                                            | Possibly less stable than GFP                                                                                          |
| PKH26                   | 535             | 580           | Compatible with deep, imaging, low auto-fluorescent background, useful for <i>in vivo</i> long-lasting studies (here 7 days), compatible with 3D IVIS Spectrum Imaging | Toxicity, required dose adaptation to cell/tissue types, Localized in lipid regions of the intracellular membranes     |

Supplementary Table 2. Advantages and disadvantages of used fluorescent markers in the contexts of the CAM model.
